# Supplementary material for: Effects of synthetic chalcone derivatives on oxidised palmitoyl arachidonoyl phosphorylcholine-induced proinflammatory chemokines production
Source: Royal Society of Chemistry journal article supplement (doi:10.1039/c5ra11073d), 2015-01-01
Supplement: c5ra11073d1.pdf [file c5ra11073d1.pdf]

### Supplementary data

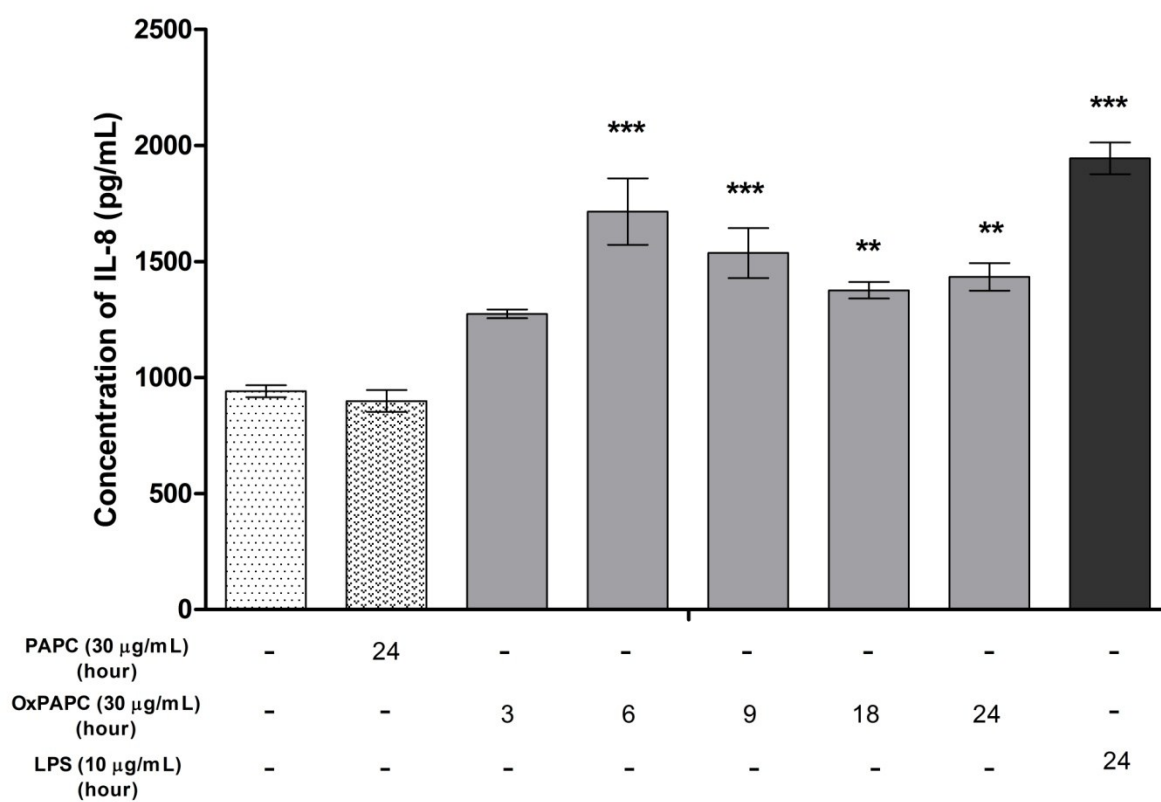

**Supplementary Figure I:** OxPAPC-induced IL-8 release on U-937 macrophages at different time intervals. Data represent mean  $\pm$  SEM of at least 3 independent experiments. \*\* $p < 0.01$ , \*\*\* $p < 0.001$  versus negative control.

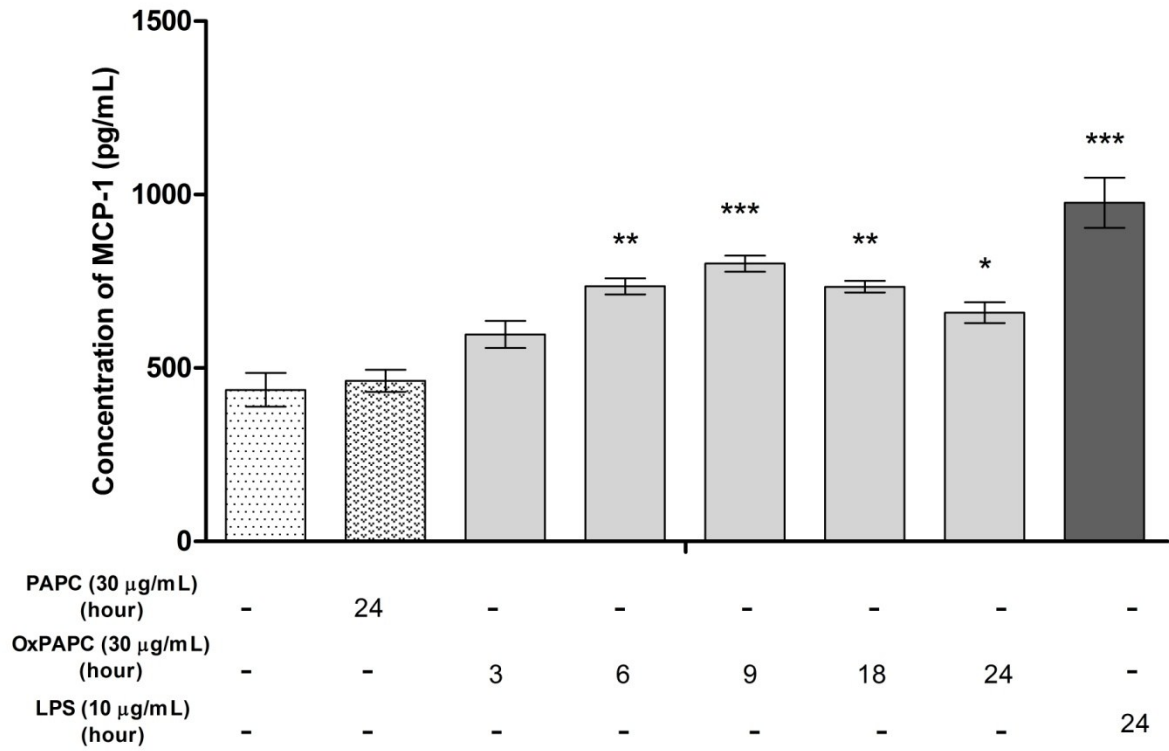

**Supplementary Figure II:** OxPAPC-induced MCP-1 release on U-937 macrophages at different time intervals. Data represent mean ± SEM of at least 3 independent experiments. \* $p < 0.05$ , \*\* $p < 0.01$ , \*\*\* $p < 0.001$  versus negative control.

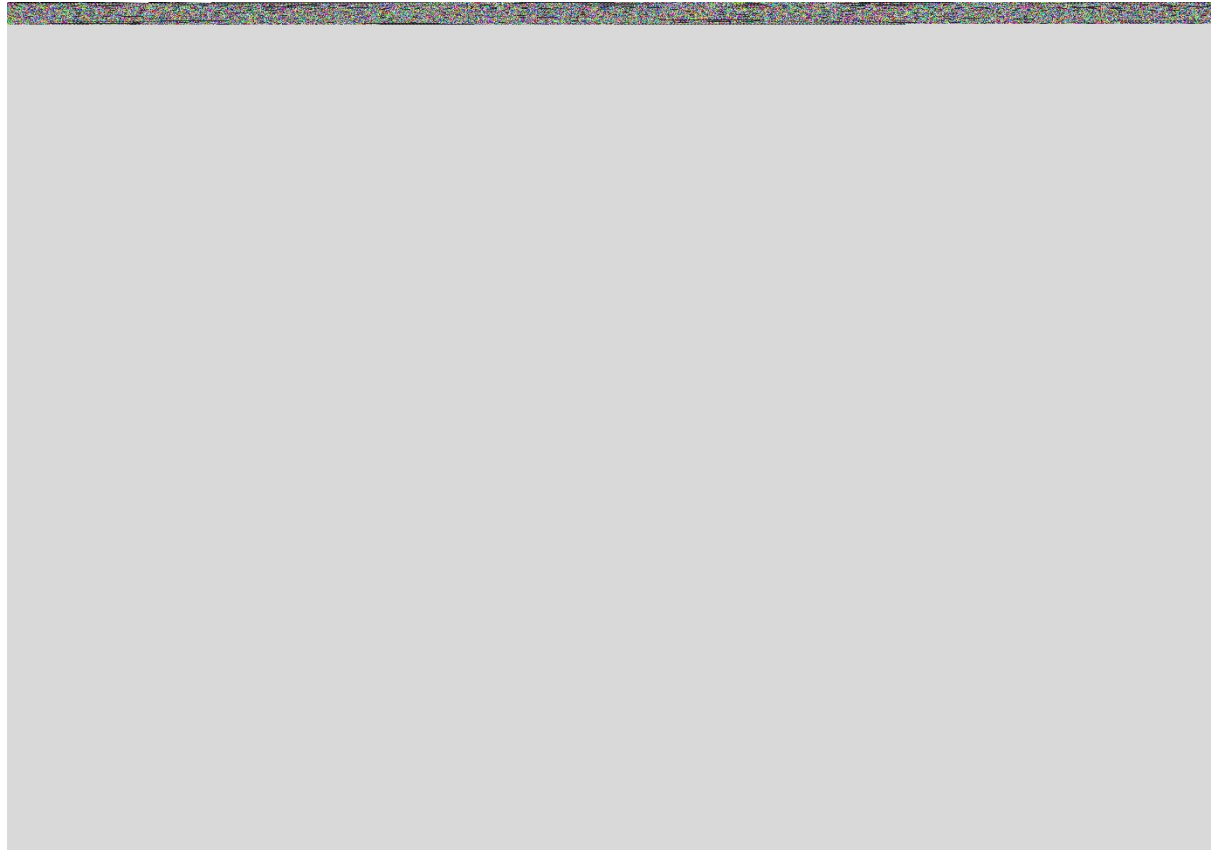

**Supplementary Figure III:** Percentage of inhibition (%) on IL-8 and MCP-1 release induced by OxPAPC on PMA-different U-937 macrophages treated with simvastatin at 6 and 9 hours, respectively. Data represent mean  $\pm$  SEM of at least 3 independent experiments. \*\* $p < 0.01$ , \*\*\* $p < 0.001$  versus negative control.
